# Supplementary material for: Fluorescence biolabeling using methylated silica nanoparticles containing a lanthanide complex
Source: Royal Society of Chemistry journal article supplement (doi:10.1039/c3tb20688b), 2013-01-01
Supplement: c3tb20688b.pdf [file c3tb20688b.pdf]

## SUPPLEMENTARY INFORMATION

### Fluorescence biolabeling using methylated silica nanoparticles containing a lanthanide complex

*Maria C. Gomes, Rosa Fernandes, Ângela Cunha, João P. Tomé and Tito Trindade*

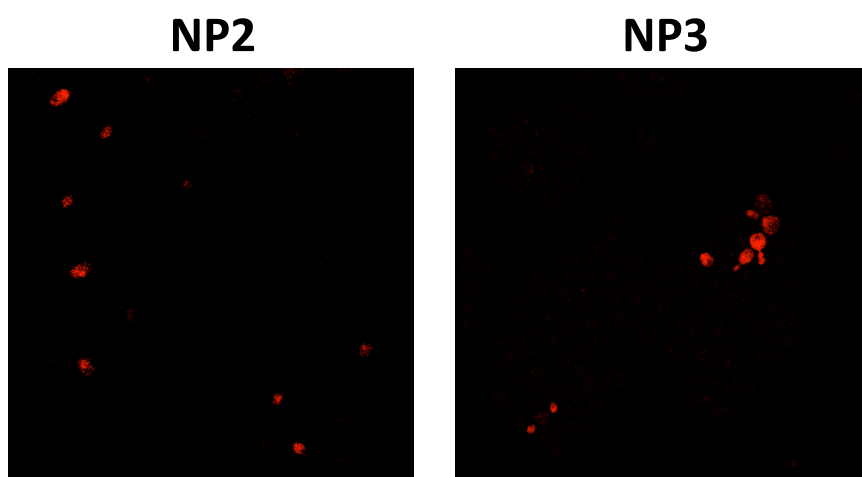

**Figure S1:** Confocal fluorescence microscopy images of *C. albicans* cells, stained with **NP 2** and **NP 3** after 30 min of incubation with  $10\ \mu\text{g mL}^{-1}$  of each sample (at  $37\ ^\circ\text{C}$ ). Excitation at 561 nm and emitted light collected above 600 nm.

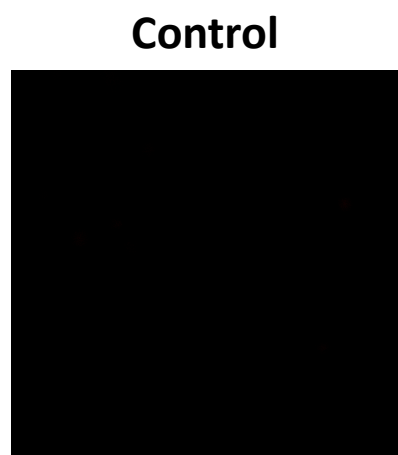

**Figure S2:** Confocal fluorescence microscopy image of *C. albicans* cells. Excitation at 405 nm and emitted light collected above 610 nm.
